# Supplementary material for: Identification of a Potent Cytotoxic Pyrazole with Anti-Breast Cancer Activity That Alters Multiple Pathways
Source: MDPI journal article supplement (doi:10.3390/cells11020254), 2022-01-12
Supplement: s1 [file s1]

## Supplementary information

### Identification of a potent cytotoxic pyrazole with anti-breast cancer activity that alters multiple pathways

Denisse A. Gutierrez<sup>1</sup>, Lisett Contreras<sup>1</sup>, Paulina J. Villanueva<sup>1</sup>, Edgar A. Borrego<sup>1</sup>, Karla Morán-Santibañez<sup>1</sup>, Jessica D. Hess<sup>1</sup>, Rebecca DeJesus<sup>1</sup>, Manuel Larragoity<sup>1</sup>, Ana P. Betancourt<sup>1</sup>, Jonathon E. Mohl<sup>2</sup>, Elisa Robles-Escajeda<sup>1</sup>, Khodeza Begum<sup>1</sup>, Sourav Roy<sup>1</sup>, Robert A. Kirken<sup>1</sup>, Armando Varela-Ramirez<sup>1\*</sup>, Renato J. Aguilera<sup>1\*</sup>.

<sup>1</sup> Department OF Biological Sciences and Cellular Characterization and Biorepository Core Facility, Border Biomedical Research Center, the University of Texas at El Paso, 500 West University Avenue, El Paso, TX 79968-0519, USA.

<sup>2</sup> Department of Bioinformatics, the University of Texas at El Paso, 500 West University Avenue, El Paso, TX 79968-0519, USA.

\* Correspondence: [raguilera@utep.edu](mailto:raguilera@utep.edu), (Tel. 915-747-6852)

### Table of Contents

**Supplementary Figure S1.** Dose-response curve and CC<sub>50</sub> value of P3C after 7 days of exposure to MDA-MB-231 cells.

**Supplementary Figure S2.** Representative flow cytometric dot plots were used to quantify the apoptosis and necrosis values induced by P3C on MDA-MB-231.

**Supplementary Figure S3.** Representative flow cytometric dot plots were required to obtain the percentages of P3C-treated MDA-MB-231 cells exhibiting caspase-3/7 activation.

**Supplementary Figure S4.** Representative flow cytometric dot plots were required to obtain the percentages of P3C-treated MDA-MB-231 cells exhibiting caspase-8 activation.

**Supplementary Figure S5.** Representative flow cytometric dot plots were necessary to obtain the percentages of P3C-treated MDA-MB-231 cells exhibiting ROS accumulation.

**Supplementary Figure S6.** Representative flow cytometric dot plots were used to determine the percentages of P3C-treated MDA-MB-231 cells exhibiting mitochondrial depolarization.

**Supplementary Figure S7.** P3C triggered PARP cleavage after 24 h of exposure to MDA-MB-231 cells.

**Supplementary Figure S8.** P3C compound significantly inhibits migration of MDA-MB-231 cells during the wound healing assay after 24 h of incubation.

**Supplementary Figure S9.** P3C-treated HeLa cells exhibited microtubule disorganization.

**Supplementary Figure S10.** P3C blocks cell division by disrupting microtubule and spindle fiber formation on HeLa cells undergoing mitosis.

**Supplementary Figure S11.** Panoramic images of HeLa cells treated with P3C and other agents.

**Citation:** Gutierrez, D.A.; Contreras, L.; Villanueva, P.J.; Borrego, E.A.; Morán-Santibañez, K.; Hess, J.D.; DeJesus, R.; Larragoity, M.; Betancourt, A.P.; Mohl, J.E.; et al. Identification of a Potent Cytotoxic Pyrazole with Anti-Breast Cancer Activity That Alters Multiple Pathways. *Cells* **2022**, *11*, 254. <https://doi.org/10.3390/cells11020254>

Academic Editors: Seung-Oe Lim and Alexander E. Kalyuzhny

Received: 1 November 2021

Accepted: 7 January 2022

Published: 12 January 2022

**Publisher's Note:** MDPI stays neutral with regard to jurisdictional claims in published maps and institutional affiliations.

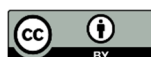

**Copyright:** © 2022 by the authors. Submitted for possible open access publication under the terms and conditions of the Creative Commons Attribution (CC BY) license (<https://creativecommons.org/licenses/by/4.0/>).

**Supplementary Figure S12.** P3C provoked a reduction of Akt and p70S6k phosphorylation after 3 h of incubation with MDA-MB-231 cells.

**Supplementary Table S1.** Top 30 GO terms found for biological processes for the 23 up-regulated genes commonly expressed in MDA-MB-231 and MDA-MB-468 cells upon P3C exposure.

**Supplementary Table S2.** Canonical pathways are associated with the 28 DEGs in MDA-MB-231 and MDA-MB-468 cells.

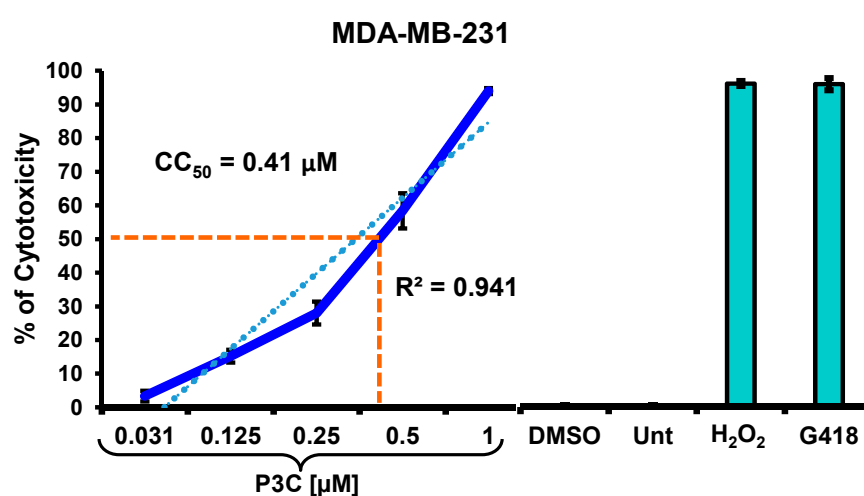

**Supplementary Figure S1.** Dose-response curve and  $\text{CC}_{50}$  value of P3C after 7 days of exposure to MDA-MB-231 cells. Cells were exposed to a gradient of concentrations of P3C (from 0.031 to 1  $\mu\text{M}$ ) for 7 days, and cytotoxicity was assessed by the differential nuclear staining assay (DNS). In this experiment, the following controls were included: 1% DMSO (vehicle), non-treated, 100  $\mu\text{M}$   $\text{H}_2\text{O}_2$ , and 10 mg/ml of G418, the last two included as positive controls for death.

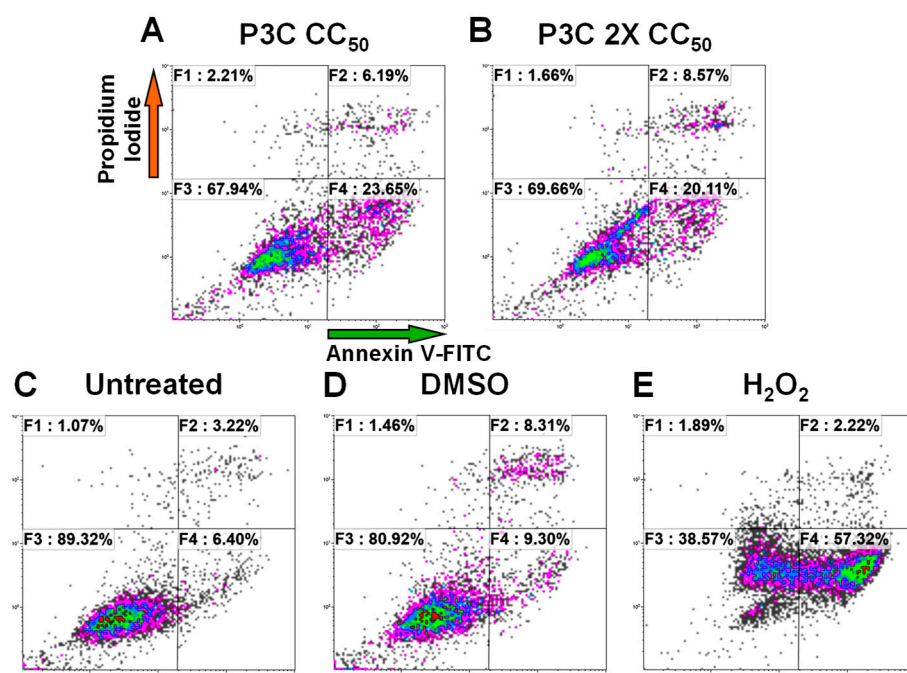

**Supplementary Figure S2.** Representative flow cytometric dot plots were used to quantify the apoptosis and necrosis values induced by P3C on MDA-MB-231. Cells were treated with P3C CC<sub>50</sub> (A) and 2X CC<sub>50</sub> (B). The following controls were included: untreated cells (C), solvent (1% DMSO) (D), and 1 mM H<sub>2</sub>O<sub>2</sub> as an apoptosis inducer (E) control. Each dot in the plots represents an event (cell). The several dot colors in the plots describe only a density gradient; low-density region, grey, and high-density, red. The FL1-FITC detector is on the x-axis, whereas the FL2-PI detector is on the y-axis. Data analysis per quadrants were interpreted as follow: the left lower quadrant specifies viable cells, double-negative for Annexin V-FITC and PI; the lower right quadrant indicate Annexin V-FITC-positive, but PI-negative, early apoptotic cells; the right upper quadrant includes double-positive Annexin V-FITC and PI-positive, late apoptotic cells; the left upper quadrant designates cells just positive to PI, the necrotic cells. Around 10,000 events were acquired and analyzed using a Gallios flow cytometer and Kaluza software (Beckman Coulter).

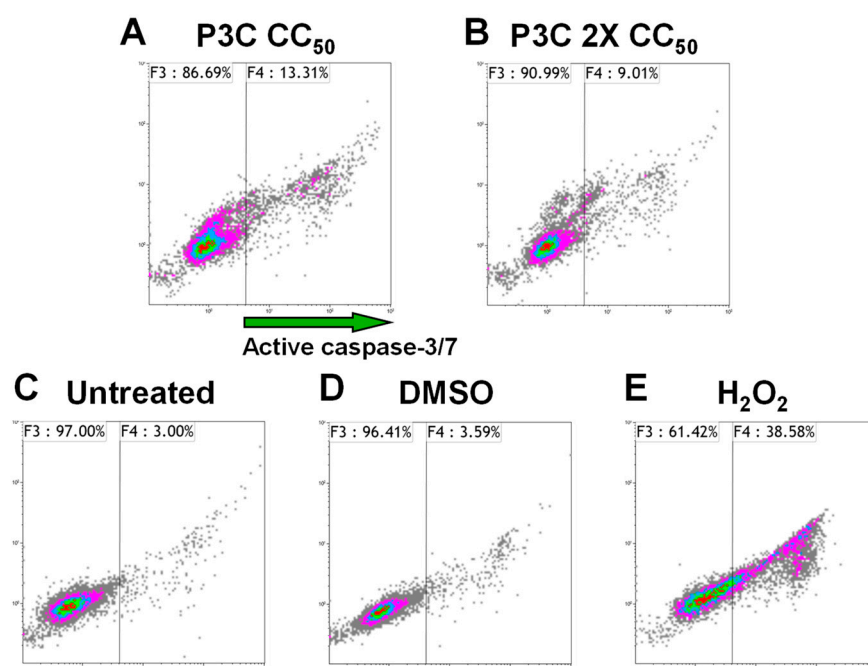

**Supplementary Figure S3.** Representative flow cytometric dot plots were required to obtain the percentages of P3C-treated MDA-MB-231 cells exhibiting caspase-3/7 activation. The NucView 488 caspase-3/7 fluorogenic substrate (Biotium) was used for this experiment series. Cells were treated with P3C CC<sub>50</sub> (A) and 2X CC<sub>50</sub> (B). The following controls were concomitantly analyzed: untreated cells (C), solvent (1% DMSO; D), and 1 mM H<sub>2</sub>O<sub>2</sub> as a caspase-3/7 activator (E) control. Each dot in the plots signifies an event (cell). The plot's dot colors variety reflects only a density gradient; low-density region, grey, and high-density, red. FL1 and FL2 detectors were plotted at the x-axis and y-axis, respectively. Approximately 10,000 events were collected and analyzed per sample using Kaluza software (Beckman Coulter).

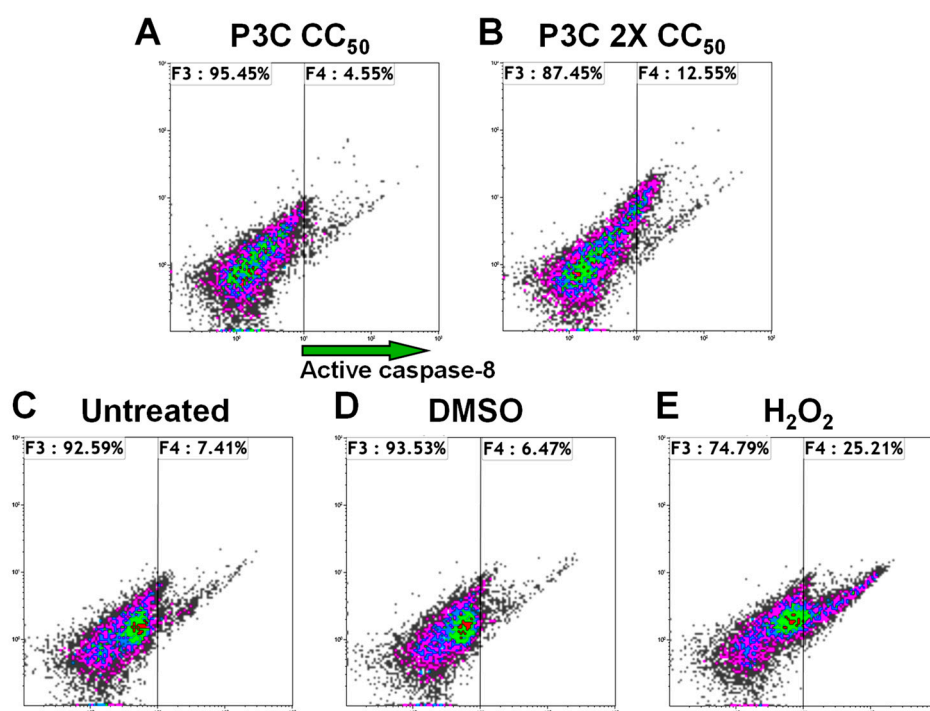

**Supplementary Figure S4.** Representative flow cytometric dot plots were required to obtain the percentages of P3C-treated MDA-MB-231 cells exhibiting caspase-8 activation. The IETD-AFC fluorogenic substrate (abcam) was used for this experiment series. Cells were exposed to the P3C CC<sub>50</sub> (A) and 2X CC<sub>50</sub> (B). The following controls were alongside analyzed: untreated cells (C), solvent (1% DMSO; D), and 1 mM H<sub>2</sub>O<sub>2</sub> as a caspase-8 activator (E) control. Each dot in the plots signifies an event (cell). The plot's dot colors diversity designates only a density gradient; grey dots, low-density region, red dots, high-density. FL1 and FL2 detectors were plotted at the x-axis and y-axis, respectively. Around 10,000 events (cells) were acquired and analyzed per sample using a Gallios flow cytometer and Kaluza software (Beckman Coulter).

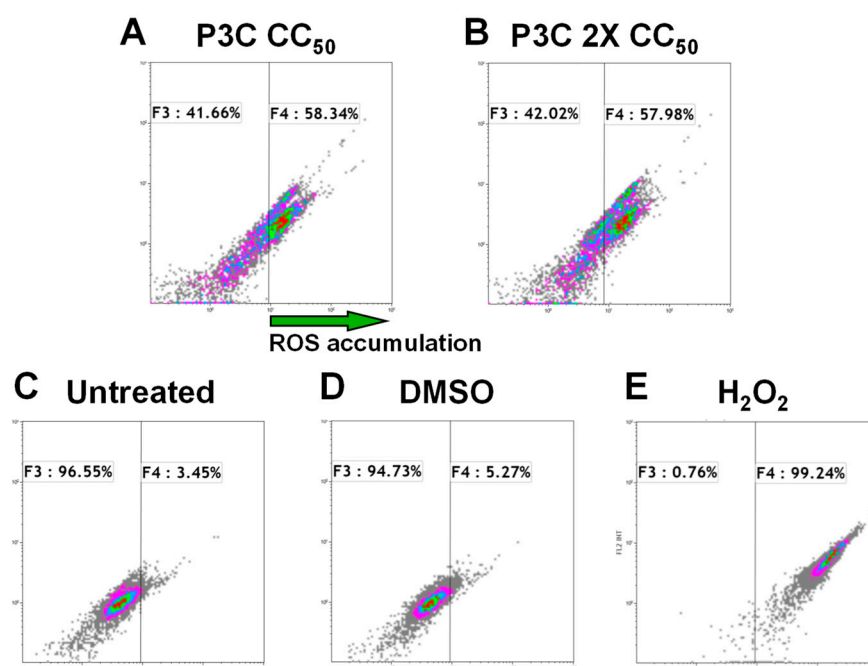

**Supplementary Figure S5.** Representative flow cytometric dot plots were necessary to obtain the percentages of P3C-treated MDA-MB-231 cells exhibiting ROS accumulation. For those experiments, carboxy-H<sub>2</sub> DCFDA (6-carboxy-2',7'-dichlorodihydrofluorescein diacetate) cell-permeant reagent (Invitrogen), and flow cytometer were used. This non-fluorescent carboxy-H<sub>2</sub> DCFDA reagent is readily transformed to a green-fluorescent form after the acetate groups are removed from its molecule by intracellular esterases and oxidation. Cells were incubated with the P3C CC<sub>50</sub> (A) and 2X CC<sub>50</sub> (B). Concurrently, the following controls were analyzed: untreated cells (C), solvent (1% DMSO; D), and 1 mM H<sub>2</sub>O<sub>2</sub> as an oxidative stress inducer (E) control. Each dot in the plots signifies an event (cell). The plot's dot colors variety designates only a density gradient; low-density region, grey dots, whereas high-density, red dots. FL1 and FL2 detectors were set up at the x- and y-axis. Approximately 10,000 events (cells) were collected and analyzed per sample using a Gallios flow cytometer and Kaluza analysis software (Beckman Coulter).

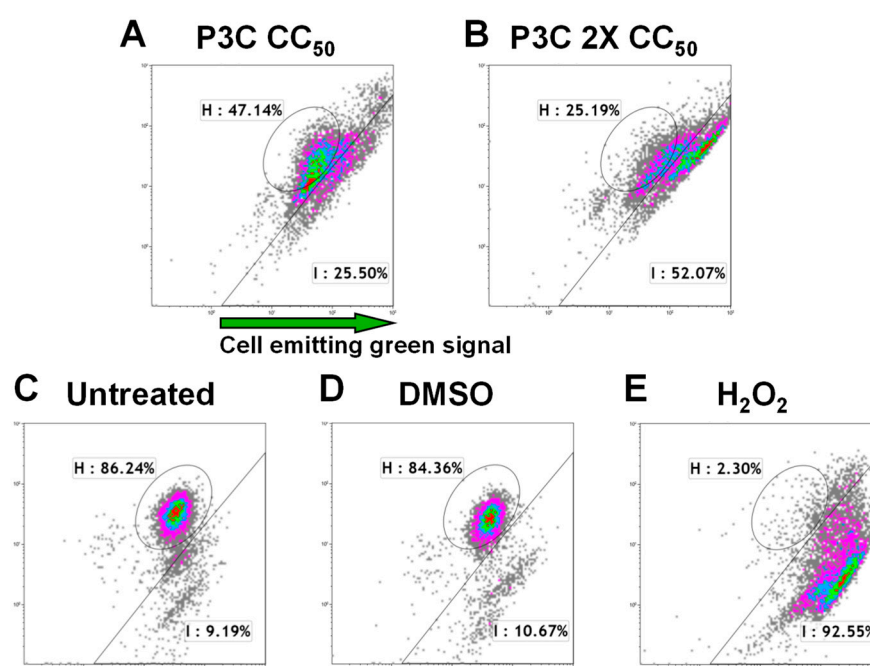

**Supplementary Figure S6.** Representative flow cytometric dot plots were used to determine the percentages of P3C-treated MDA-MB-231 cells exhibiting mitochondrial depolarization. The JC-1 polychromatic reagent (Invitrogen) and flow cytometer were used. When the mitochondrial membrane potential is intact, synonyms of healthy cells, the JC-1 forms aggregates, emitting red fluorescence signal (top left subpopulation). In contrast, damaged cells with depolarized mitochondria form JC-1 monomers emitting a green fluorescent signal (bottom right subpopulation). Cells were incubated with the P3C CC<sub>50</sub> (A) and 2X CC<sub>50</sub> (B). Simultaneously, the following controls were analyzed: untreated cells (C), solvent (1% DMSO; D), and 1mM H<sub>2</sub>O<sub>2</sub> as an oxidative stress inducer (E) control. Each dot in the plots denotes an event (cell). The plot's dot colors variety designates only a density gradient; low-density region, grey dots, whereas high-density, red dots. FL1 and FL2 detectors were set up at the x- and y-axis. Around 10,000 events (cells) were collected and analyzed per sample using a Gallios flow cytometer and Kaluza analysis software (Beckman Coulter).

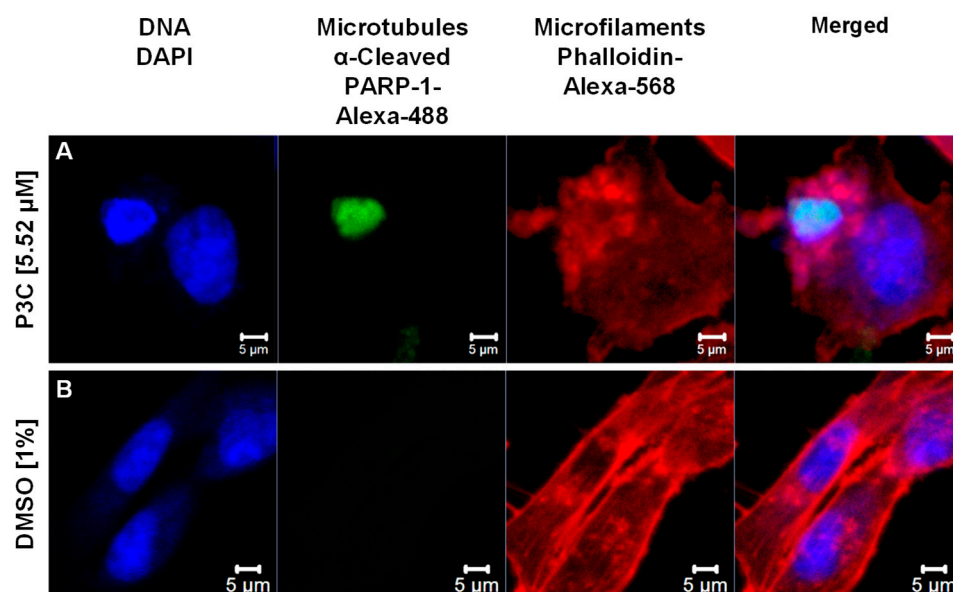

**Supplementary Figure S7. P3C triggered PARP cleavage in MDA-MB-231 cells after 24 h of exposure.** (A) Cells exposed to 5.52  $\mu$ M of P3C ( $CC_{50}$ ). (B) Cells incubated with vehicle control (1% DMSO). After treatment, cells were fixed and triple-stained with DAPI (nuclei),  $\alpha$ -cleaved PARP-1-Alexa 488, and Phalloidin-Alexa 568 (microfilaments). The confocal immunofluorescent analysis was performed using an LSM 700 Zeiss microscope and ZEN 2009 software.



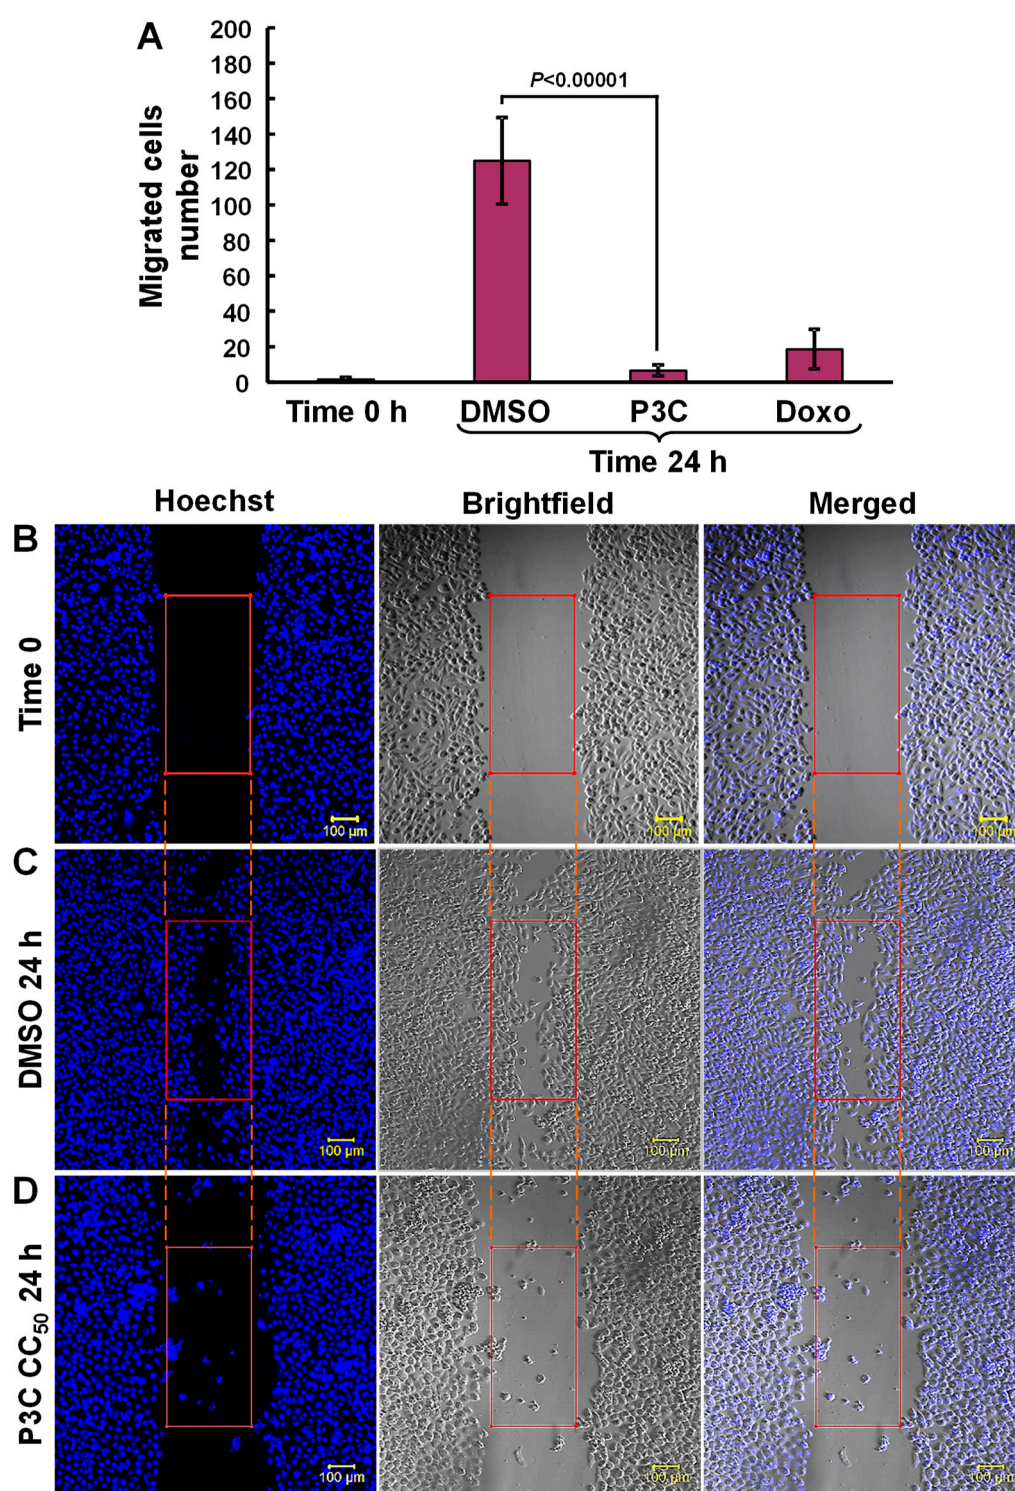

**Supplementary Figure S8. P3C treatment significantly inhibits migration of MDA-MB-231 cells during the wound healing assay after 24 h of incubation.** (A) Each experimental point represents the average and standard deviation of 10 independent measurements. The following controls were included: doxorubicin (Doxo), as positive of migration inhibition, and DMSO as solvent control. After 24 h, the number of cells migrating inside the defined rectangular area (demarcated by the rectangular red boundary), included in each image, was counted. Representative images showing the nuclei (blue; Hoechst), bright field illumination (phase contrast), and merged are depicted: (B) time 0 h, (C) DMSO (solvent control) 24 h, and (D) P3C experimental compound. Acquisition and analysis of the images were performed via Zen 2009 software (Zeiss).

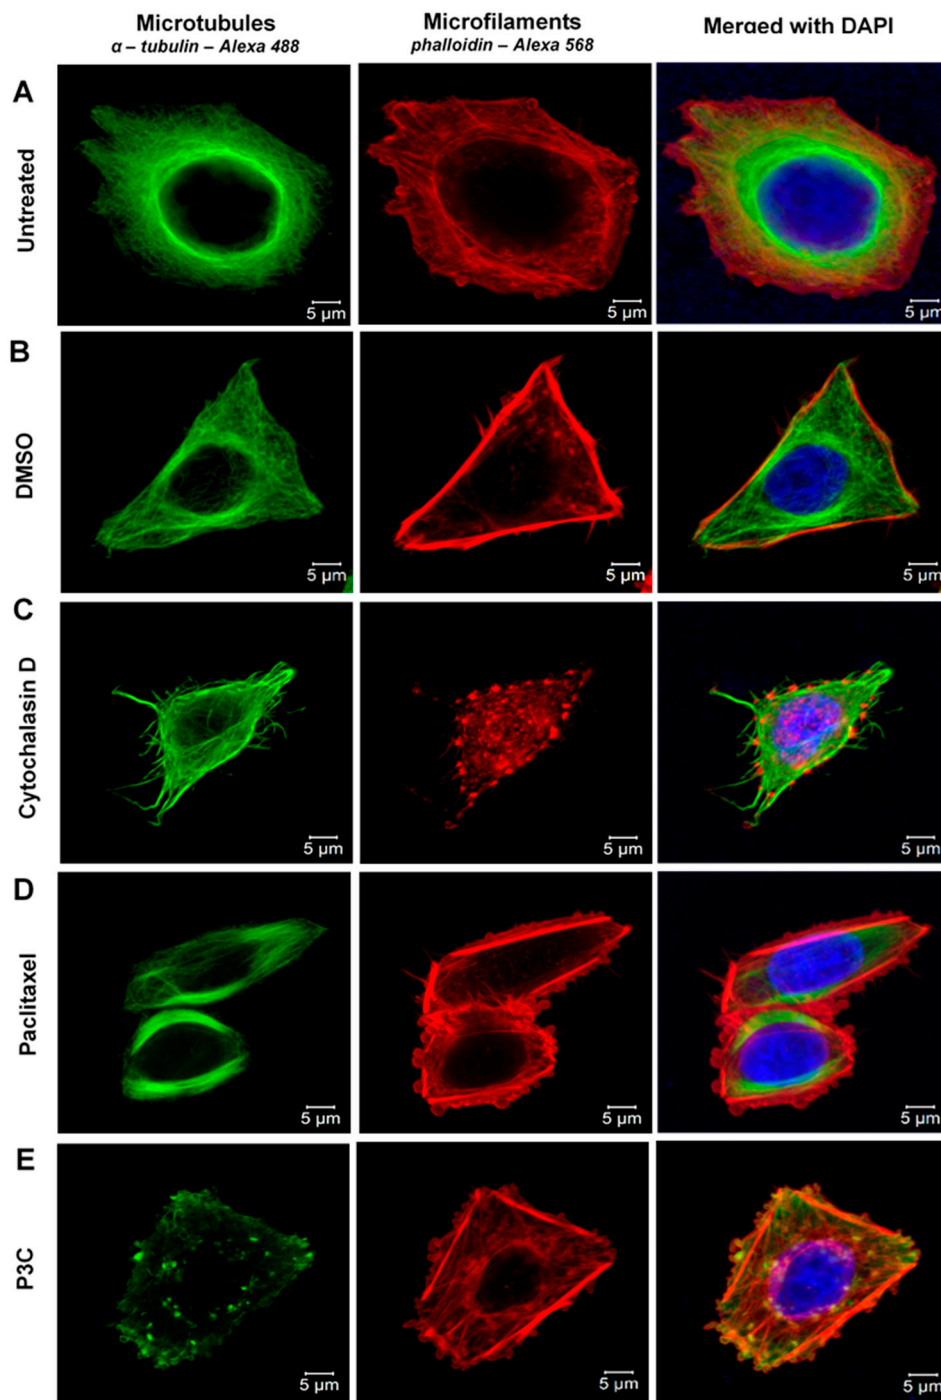

**Supplementary Figure S9.** Confocal microscopy images of HeLa cells demonstrated that **P3C** ( $CC_{50}$  5.52  $\mu$ M; panel E) **perturbs microtubule organization**. HeLa cells were treated and stained with  $\alpha$ -tubulin-Alexa-488 (microtubules), Phalloidin-Alexa-568 (actin), and DAPI (nucleus). Paclitaxel (D) (spindle function inhibitor), Cytochalasin D (C) (actin polymerization inhibitor), DMSO (B) (vehicle) and untreated (A) cells were included as controls.

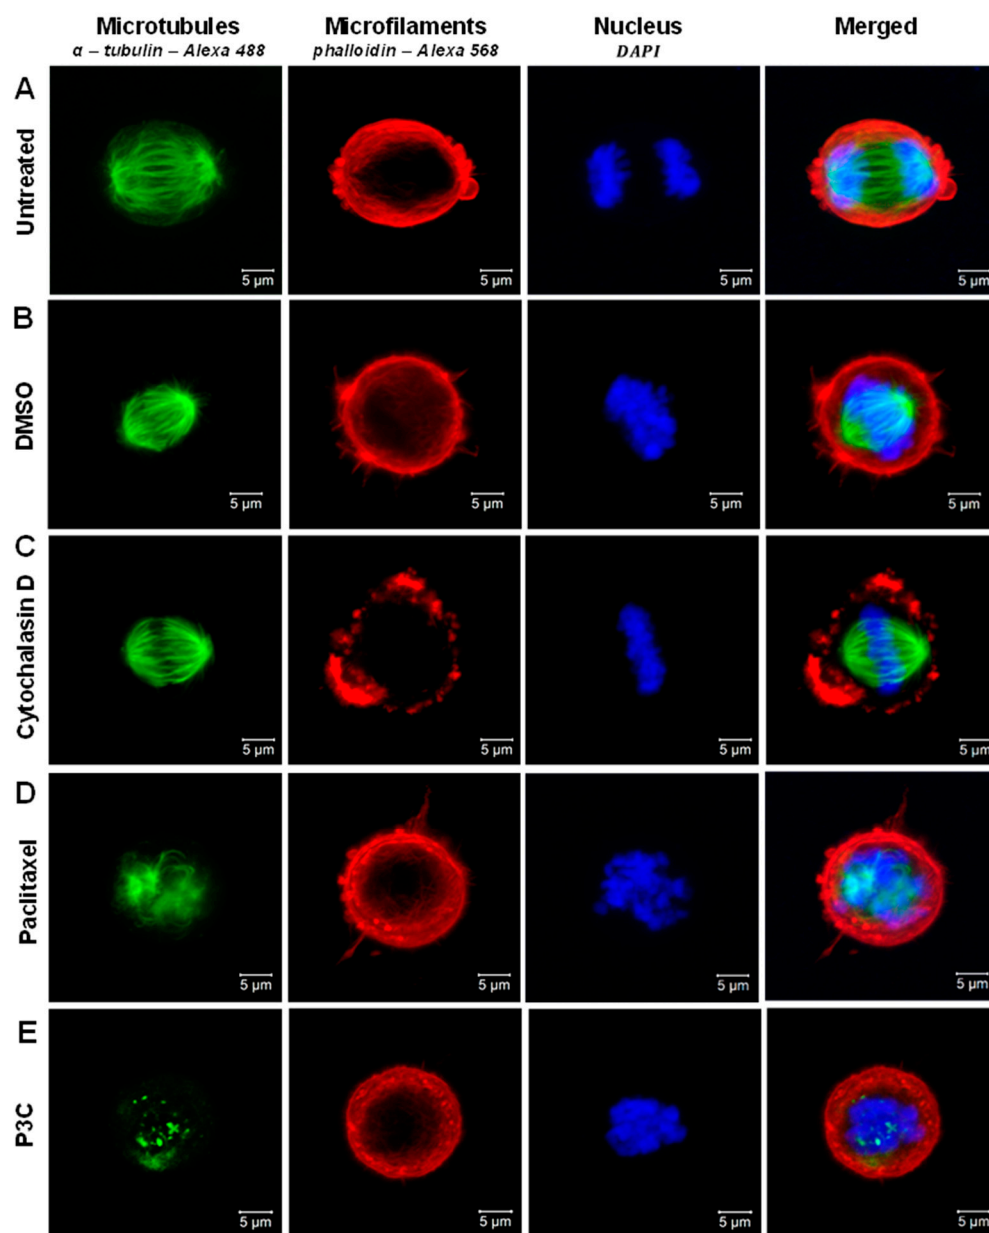

**Supplementary Figure 10.** P3C blocks cell division by disrupting microtubule and spindle fiber formation on HeLa cells undergoing mitosis. 2 h after cells were treated with P3C (CC<sub>50</sub>) (E), Paclitaxel (D), Cytochalasin D (C), DMSO (B), or untreated (A) cells were immune-stained with  $\alpha$ -tubulin-Alexa-488 (microtubules), Phalloidin-Alexa-568 (actin), and DAPI (nucleus). Cells were examined *via* confocal microscopy, and only cells undergoing cell division were imaged. Chromosome organization shown on the DAPI staining shows that cells are undergoing mitosis.

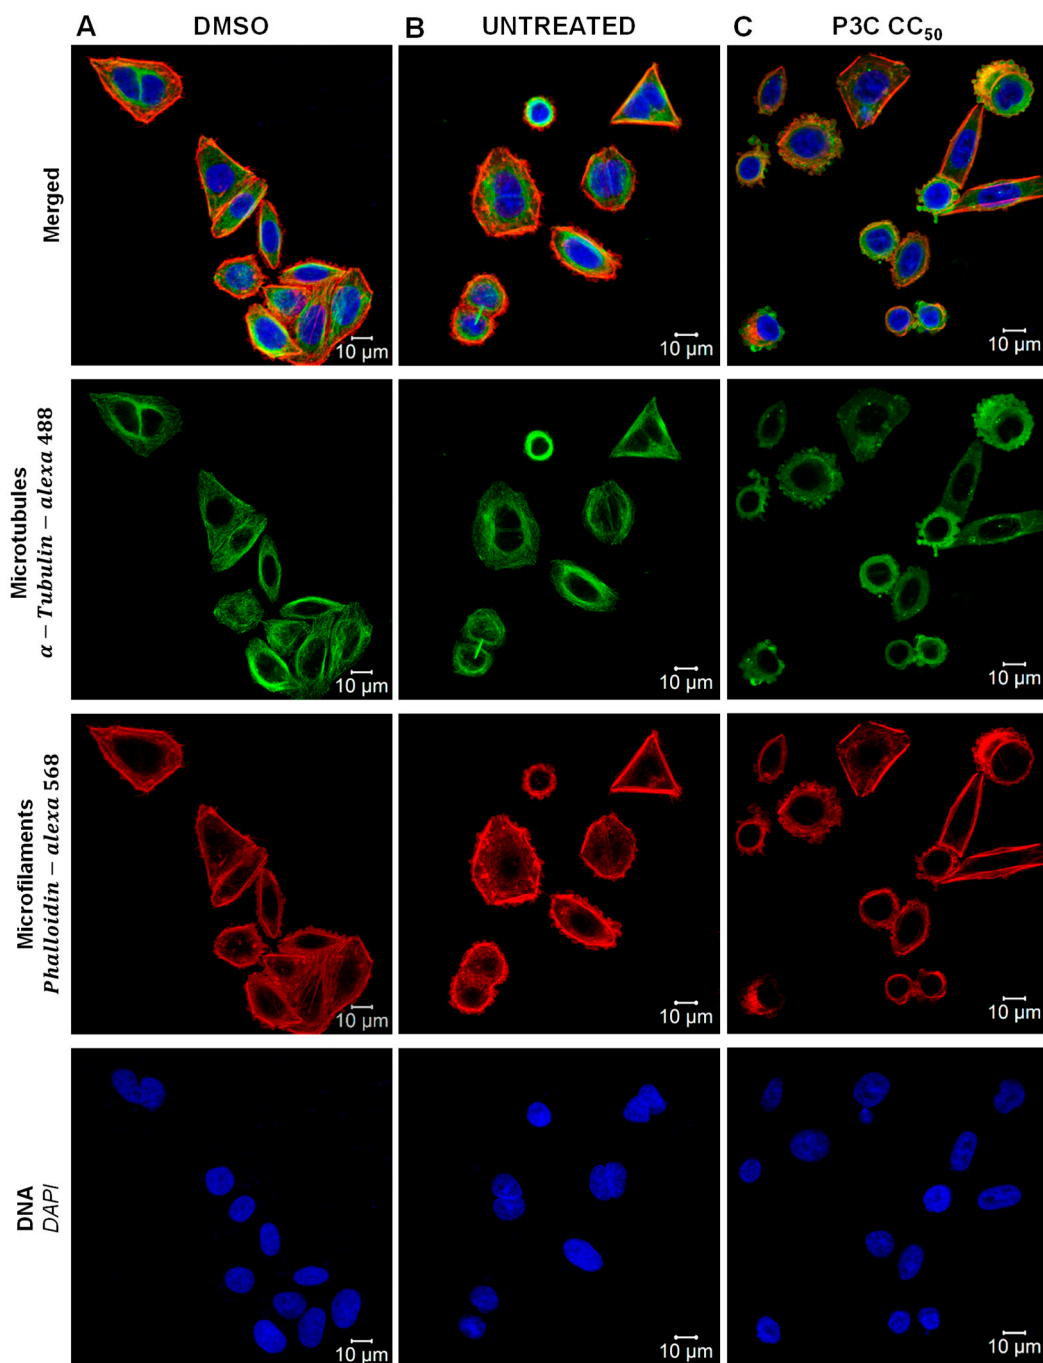

**Supplementary Figure 11.** Panoramic images of HeLa cells treated with P3C (C), DMSO (A), Cytochalasin D (D), Paclitaxel (E), and untreated (B) (continued next page)



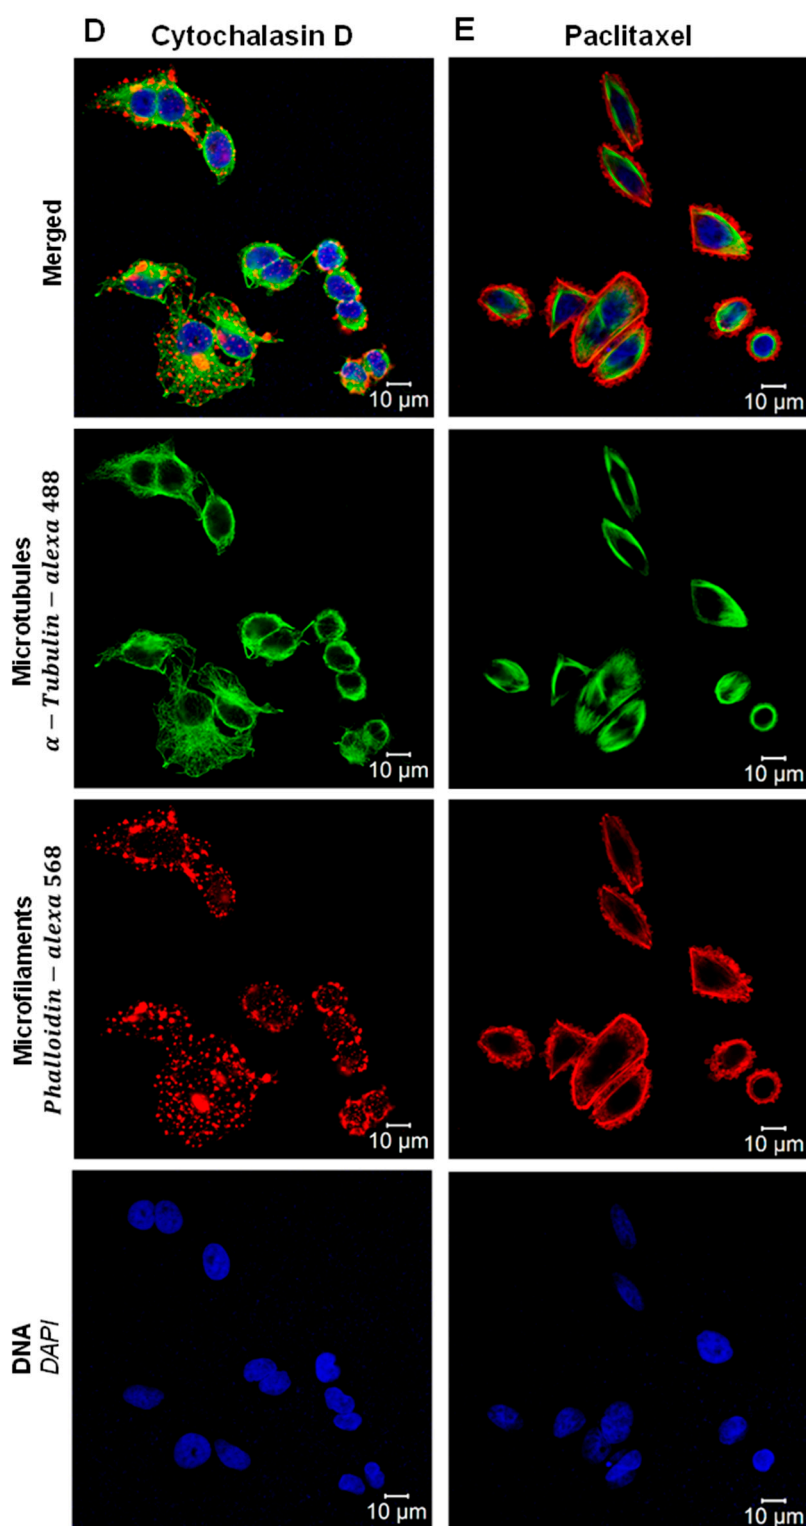

**Supplementary Figure S11 (continued).** Panoramic images of HeLa cells treated with P3C (C), DMSO (A), Cytochalasin D (D), Paclitaxel (E), and untreated (B).

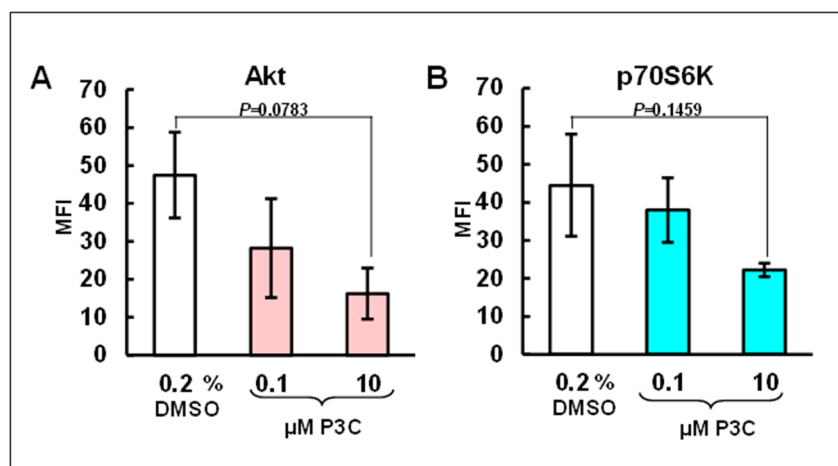

**Supplementary Figure S12.** P3C provoked a reduction of Akt and p70S6k phosphorylation after 3 h of incubation with MDA-MB-231 cells. Whereas P3C reduced Akt and p70S6k phosphorylation, no statistical significance was observed. A solvent control, 0.2% v/v of DMSO, was included. A bead-Based Multiplex Assay *via* the Luminex technology was employed for this series of experiments.

**Supplementary Table S1.** Top 30 GO terms found for biological processes for the 23 up-regulated genes commonly expressed in MDA-MB-231 and MDA-MB-468 cells upon P3C exposure\*.

| #term ID   | Term description                                           | Gene count | FDR    | Genes involved                                                                                                                 |
|------------|------------------------------------------------------------|------------|--------|--------------------------------------------------------------------------------------------------------------------------------|
| GO:0009605 | <b>Response to external stimulus</b>                       | 12         | 0.0015 | HBEGF,EGR1,BTG2,REL,DDIT4,TNFRSF10D,PLAUR,DUSP10,PRDM1,GBP2,PIM1,BNIP3L                                                        |
| GO:0051172 | Negative regulation of nitrogen compound metabolic process | 12         | 0.0016 | HBEGF,EGR1,DUSP4,MXD1,BTG2,REL,DDIT4,TNFRSF10D,PLAUR,DUSP10,PRDM1,CDKN1C                                                       |
| GO:0010605 | negative regulation of macromolecule metabolic process     | 12         | 0.0021 | HBEGF,EGR1,DUSP4,MXD1,BTG2,REL,DDIT4,TNFRSF10D,PLAUR,DUSP10,PRDM1,CDKN1C                                                       |
| GO:0010941 | <b>Regulation of cell death</b>                            | 10         | 0.0021 | BIK,EGR1,BTG2,REL,DDIT4,TNFRSF10D,PLAUR,PIM1,BNIP3L,NDRG1                                                                      |
| GO:0031324 | Negative regulation of cellular metabolic process          | 12         | 0.0021 | HBEGF,EGR1,DUSP4,MXD1,BTG2,REL,DDIT4,TNFRSF10D,PLAUR,DUSP10,PRDM1,CDKN1C                                                       |
| GO:0042127 | <b>Regulation of cell population proliferation</b>         | 10         | 0.0021 | HBEGF,EGR1,FOSL2,BTG2,TNFRSF10D,DUSP10,PRDM1,PIM1,NDRG1,CDKN1C                                                                 |
| GO:0048523 | Negative regulation of cellular process                    | 15         | 0.0027 | HBEGF,EGR1,DUSP4,MXD1,BTG2,REL,DDIT4,TNFRSF10D,PLAUR,DUSP10,PRDM1,PIM1,BNIP3L,NDRG1,CDKN1C                                     |
| GO:0051248 | Negative regulation of protein metabolic process           | 8          | 0.0027 | HBEGF,DUSP4,BTG2,DDIT4,TNFRSF10D,PLAUR,DUSP10,CDKN1C                                                                           |
| GO:0032268 | Regulation of cellular protein metabolic process           | 11         | 0.0042 | HBEGF,EGR1,DUSP4,BTG2,DDIT4,KRT17,TNFRSF10D,PLAUR,DUSP10,PIM1,CDKN1C                                                           |
| GO:0051707 | Response to other organism                                 | 8          | 0.0042 | EGR1,REL,DDIT4,TNFRSF10D,DUSP10,PRDM1,GBP2,BNIP3L                                                                              |
| GO:0048856 | Anatomical structure development                           | 15         | 0.0063 | BIK,HBEGF,EGR1,DUSP4,MXD1,FOSL2,BTG2,DDIT4,KRT17,TNFRSF10D,DUSP10,PRDM1,PLEKHO1,PIM1,NDRG1                                     |
| GO:0001932 | <b>Regulation of protein phosphorylation</b>               | 8          | 0.0073 | HBEGF,EGR1,DUSP4,DDIT4,PLAUR,DUSP10,PIM1,CDKN1C                                                                                |
| GO:0032269 | Negative regulation of cellular protein metabolic process  | 7          | 0.0075 | DUSP4,BTG2,DDIT4,TNFRSF10D,PLAUR,DUSP10,CDKN1C                                                                                 |
| GO:0050794 | Regulation of cellular process                             | 21         | 0.0075 | BIK,HBEGF,EGR1,DUSP4,MXD1,FOSL2,TRIM36,BTG2,REL,DDIT4,KRT17,TNFRSF10D,PLAUR,DUSP10,PRDM1,PLEKHO1,GBP2,PIM1,BNIP3L,NDRG1,CDKN1C |
| GO:0007275 | Multicellular organism development                         | 14         | 0.0095 | BIK,HBEGF,EGR1,DUSP4,MXD1,FOSL2,BTG2,DDIT4,KRT17,TNFRSF10D,DUSP10,PRDM1,PIM1,NDRG1                                             |
| GO:0008219 | <b>Cell death</b>                                          | 7          | 0.0095 | BIK,FOSL2,DDIT4,KRT17,TNFRSF10D,PIM1,BNIP3L                                                                                    |
| GO:0031323 | Regulation of cellular metabolic process                   | 16         | 0.0095 | HBEGF,EGR1,DUSP4,MXD1,FOSL2,BTG2,REL,DDIT4,KRT17,TNFRSF10D,PLAUR,DUSP10,PRDM1,PIM1,BNIP3L,CDKN1C                               |
| GO:0031327 | Negative regulation of cellular biosynthetic process       | 8          | 0.0095 | HBEGF,EGR1,MXD1,BTG2,REL,DDIT4,PRDM1,CDKN1C                                                                                    |
| GO:0035970 | <b>Peptidyl-threonine dephosphorylation</b>                | 2          | 0.0095 | DUSP4,DUSP10                                                                                                                   |
| GO:0042981 | <b>Regulation of apoptotic process</b>                     | 8          | 0.0095 | BIK,EGR1,BTG2,TNFRSF10D,PLAUR,PIM1,BNIP3L,NDRG1                                                                                |
| GO:0048522 | Positive regulation of cellular process                    | 14         | 0.0109 | BIK,HBEGF,EGR1,FOSL2,BTG2,REL,DDIT4,KRT17,PLAUR,DUSP10,PRDM1,PIM1,BNIP3L,CDKN1C                                                |
| GO:0001666 | Response to hypoxia                                        | 4          | 0.0124 | EGR1,DDIT4,BNIP3L,NDRG1                                                                                                        |
| GO:1901214 | Regulation of neuron death                                 | 4          | 0.0124 | EGR1,BTG2,REL,DDIT4                                                                                                            |
| GO:0000188 | <b>Inactivation of MAPK activity</b>                       | 2          | 0.0127 | DUSP4,DUSP10                                                                                                                   |
| GO:0006950 | <b>Response to stress</b>                                  | 11         | 0.0127 | HBEGF,EGR1,BTG2,REL,DDIT4,TNFRSF10D,PLAUR,PRDM1,GBP2,BNIP3L,NDRG1                                                              |
| GO:0006952 | Defense response                                           | 7          | 0.0127 | EGR1,REL,DDIT4,TNFRSF10D,PRDM1,GBP2,BNIP3L                                                                                     |
| GO:0032501 | Multicellular organismal process                           | 16         | 0.0127 | BIK,HBEGF,EGR1,DUSP4,MXD1,FOSL2,BTG2,DDIT4,KRT17,TNFRSF10D,PLAUR,TPM4,DUSP10,PRDM1,PIM1,NDRG1                                  |
| GO:0051171 | Regulation of nitrogen compound metabolic process          | 15         | 0.0127 | HBEGF,EGR1,DUSP4,MXD1,FOSL2,BTG2,REL,DDIT4,KRT17,TNFRSF10D,PLAUR,DUSP10,PRDM1,PIM1,CDKN1C                                      |
| GO:0061041 | Regulation of wound healing                                | 3          | 0.0127 | HBEGF,PLAUR,DUSP10                                                                                                             |

\* Only terms with significant enrichment are annotated (corrected  $P$ -values  $\leq 0.05$ ), and highlighted terms were considered relevant for this study. FDR: False Discovery Rate, refers to the significance of the enrichment. Corrected  $P$ -values are shown for multiple testing within each category using the Benjamini–Hochberg procedure.

**Supplementary Table S2.** Canonical pathways associated with the 28 DEGs in common in MDA-MB-231 and MDA-MB-468 cells.

| Ingenuity Canonical Pathways                                                  | -log(p-value) | Ratio   | Genes involved   | p-value  |
|-------------------------------------------------------------------------------|---------------|---------|------------------|----------|
| Role of Tissue Factor in Cancer                                               | 3.46          | 0.0259  | EGR1,HBEGF,PLAUR | 3.47E-04 |
| <b>SAPK/JNK Signaling</b>                                                     | 2.19          | 0.0196  | DUSP10,DUSP4     | 6.46E-03 |
| GnRH Signaling                                                                | 1.75          | 0.0116  | EGR1,HBEGF       | 1.78E-02 |
| Polyamine Regulation in Colon Cancer                                          | 1.57          | 0.0435  | MXD1             | 2.69E-02 |
| Coagulation System                                                            | 1.39          | 0.0286  | PLAUR            | 4.07E-02 |
| <b>Cell Cycle Regulation by BTG Family Proteins</b>                           | 1.37          | 0.027   | BTG2             | 4.27E-02 |
| Docosahexaenoic Acid (DHA) Signaling                                          | 1.36          | 0.0263  | BIK              | 4.37E-02 |
| Triacylglycerol Biosynthesis                                                  | 1.29          | 0.0227  | DGAT2            | 5.13E-02 |
| Retinoic acid Mediated Apoptosis Signaling                                    | 1.16          | 0.0167  | TNFRSF10D        | 6.92E-02 |
| Pyridoxal 5'-phosphate Salvage Pathway                                        | 1.12          | 0.0152  | PIM1             | 7.59E-02 |
| GM-CSF Signaling                                                              | 1.1           | 0.0143  | PIM1             | 7.94E-02 |
| <b>Protein Kinase A Signaling</b>                                             | 1.09          | 0.005   | DUSP10,DUSP4     | 8.13E-02 |
| Glioma Invasiveness Signaling                                                 | 1.08          | 0.0137  | PLAUR            | 8.32E-02 |
| VDR/RXR Activation                                                            | 1.05          | 0.0128  | MXD1             | 8.91E-02 |
| Acute Myeloid Leukemia Signaling                                              | 1             | 0.0112  | PIM1             | 1.00E-01 |
| Glucocorticoid Receptor Signaling                                             | 0.987         | 0.00433 | CDKN1C,KRT17     | 1.03E-01 |
| ErbB Signaling                                                                | 0.975         | 0.0106  | HBEGF            | 1.06E-01 |
| Salvage Pathways of Pyrimidine Ribonucleotides                                | 0.959         | 0.0102  | PIM1             | 1.10E-01 |
| Neuregulin Signaling                                                          | 0.932         | 0.00952 | HBEGF            | 1.17E-01 |
| CDK5 Signaling                                                                | 0.921         | 0.00926 | EGR1             | 1.20E-01 |
| Pancreatic Adenocarcinoma Signaling                                           | 0.917         | 0.00917 | HBEGF            | 1.21E-01 |
| <b>p38 MAPK Signaling</b>                                                     | 0.883         | 0.00847 | DUSP10           | 1.31E-01 |
| G Beta Gamma Signaling                                                        | 0.87          | 0.0082  | HBEGF            | 1.35E-01 |
| IL-12 Signaling and Production in Macrophages                                 | 0.836         | 0.00752 | REL              | 1.46E-01 |
| MSP-RON Signaling In Cancer Cells Pathway                                     | 0.833         | 0.00746 | PLAUR            | 1.47E-01 |
| <b>STAT3 Pathway</b>                                                          | 0.83          | 0.00741 | PIM1             | 1.48E-01 |
| D-myo-inositol (1,4,5,6)-Tetrakisphosphate Biosynthesis                       | 0.81          | 0.00704 | DUSP10           | 1.55E-01 |
| D-myo-inositol (3,4,5,6)-tetrakisphosphate Biosynthesis                       | 0.81          | 0.00704 | DUSP10           | 1.55E-01 |
| 3-phosphoinositide Degradation                                                | 0.772         | 0.00641 | DUSP10           | 1.69E-01 |
| D-myo-inositol-5-phosphate Metabolism                                         | 0.77          | 0.00637 | DUSP10           | 1.70E-01 |
| 3-phosphoinositide Biosynthesis                                               | 0.747         | 0.00602 | DUSP10           | 1.79E-01 |
| CXCR4 Signaling                                                               | 0.745         | 0.00599 | EGR1             | 1.80E-01 |
| T Cell Exhaustion Signaling Pathway                                           | 0.726         | 0.00571 | PRDM1            | 1.88E-01 |
| B Cell Receptor Signaling                                                     | 0.703         | 0.00538 | EGR1             | 1.98E-01 |
| Regulation of The Epithelial-Mesenchymal Transition By Growth Factors Pathway | 0.699         | 0.00532 | EGR1             | 2.00E-01 |
| Regulation of the Epithelial-Mesenchymal Transition Pathway                   | 0.69          | 0.00521 | EGR1             | 2.04E-01 |
| RAR Activation                                                                | 0.686         | 0.00515 | REL              | 2.06E-01 |
| HER-2 Signaling in Breast Cancer                                              | 0.686         | 0.00515 | HBEGF            | 2.06E-01 |
| Superpathway of Inositol Phosphate Compounds                                  | 0.676         | 0.00503 | DUSP10           | 2.11E-01 |
| IL-8 Signaling                                                                | 0.674         | 0.005   | HBEGF            | 2.12E-01 |
| <b>ERK/MAPK Signaling</b>                                                     | 0.67          | 0.00495 | DUSP4            | 2.14E-01 |
| Calcium Signaling                                                             | 0.664         | 0.00485 | TPM4             | 2.17E-01 |
| mTOR Signaling                                                                | 0.656         | 0.00476 | DDIT4            | 2.21E-01 |
| Osteoarthritis Pathway                                                        | 0.638         | 0.00455 | DDIT4            | 2.30E-01 |
| cAMP-mediated signaling                                                       | 0.622         | 0.00437 | DUSP4            | 2.39E-01 |
| G-Protein Coupled Receptor Signaling                                          | 0.556         | 0.00365 | DUSP4            | 2.78E-01 |
| Sirtuin Signaling Pathway                                                     | 0.533         | 0.00344 | NDRG1            | 2.93E-01 |
